# Supplementary material for: Highly conjugated 2D COF/MOF composites for bifunctional electrocatalytic alkaline HER and OER with enhanced activity and stability
Source: Royal Society of Chemistry journal article supplement (doi:10.1039/d5im00302d), 2026-01-01
Supplement: d5im00302d1.pdf [file d5im00302d1.pdf]

## Supporting Information

### **Highly Conjugated 2D COF/MOF Composites for Bifunctional Electrocatalytic Alkaline HER and OER with enhanced activity and stability**

Yang Liu,<sup>a,b</sup> Zhao-Di Yang,<sup>\*a</sup> Rui Zhang,<sup>a</sup> Yingchao Lai,<sup>a</sup> Yu Zhang<sup>\*b</sup> and Guiling Zhang<sup>a</sup>

*<sup>a</sup>. Heilongjiang Provincial Key Laboratory of CO<sub>2</sub> Resource Utilization and Energy Catalytic Materials, School of Materials Science and Chemical Engineering, Harbin University of Science and Technology, Harbin, Heilongjiang, 150080, PR China.*

*<sup>b</sup>. Institute of Process Engineering, Chinese Academy of Sciences, Beijing, 100080, Beijing, PR China.*

\*Corresponding authors

E-mail: yangzhaodi@163.com (Z.-D. Yang); zhangyu@ipe.ac.cn (Y. Zhang)

## Supplementary Figures

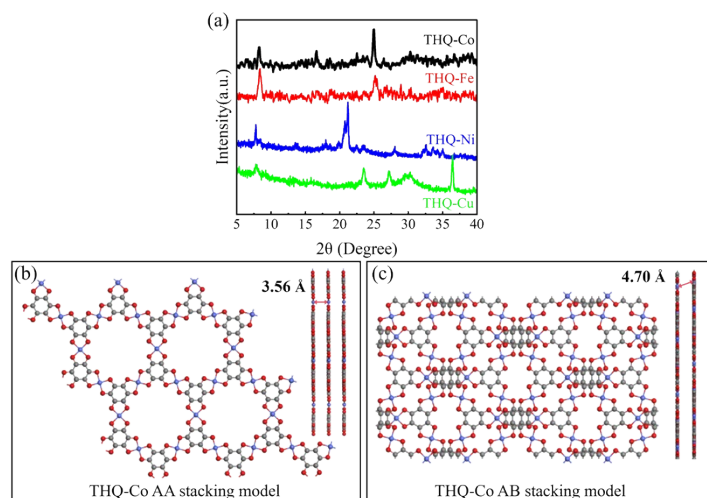

**Fig. S1** (a) XRD pattern of THQ-M samples, (b) AA and (c) AB stacking models of THQ-Co.

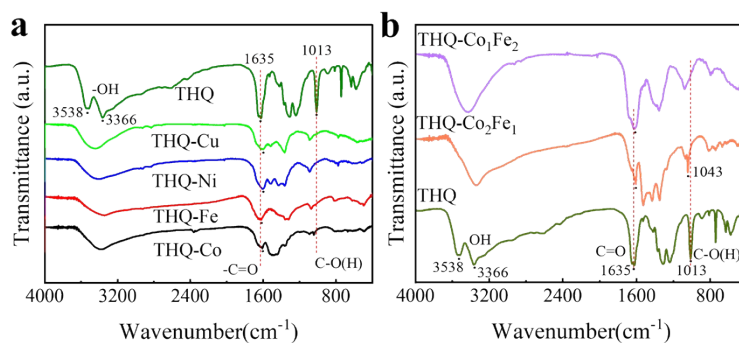

**Fig. S2** Infrared spectra of THQ-M samples.

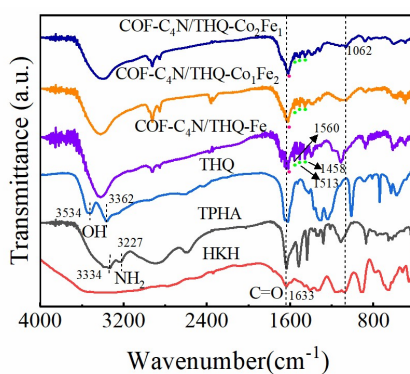

**Fig. S3** IR spectra of COF-C<sub>4</sub>N/THQ-Fe, COF-C<sub>4</sub>N/THQ-Co<sub>1</sub>Fe<sub>2</sub> and COF-C<sub>4</sub>N/THQ-Co<sub>2</sub>Fe<sub>1</sub> composite catalysts.

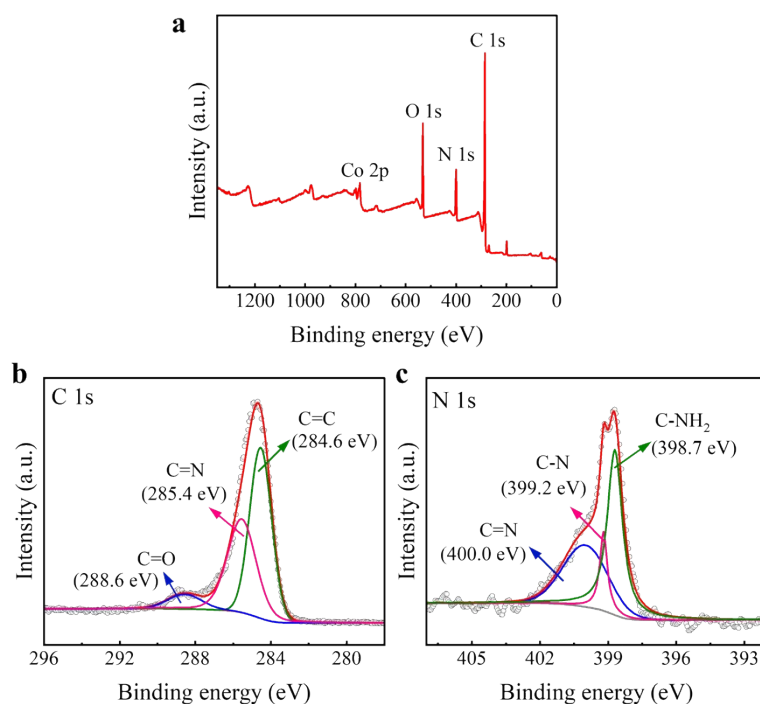

**Fig. S4** (a) XPS total spectrum of COF-C<sub>4</sub>N/THQ-Co sample. XPS spectra of the COF-C<sub>4</sub>N: (b) C 1s and (c) N 1s.

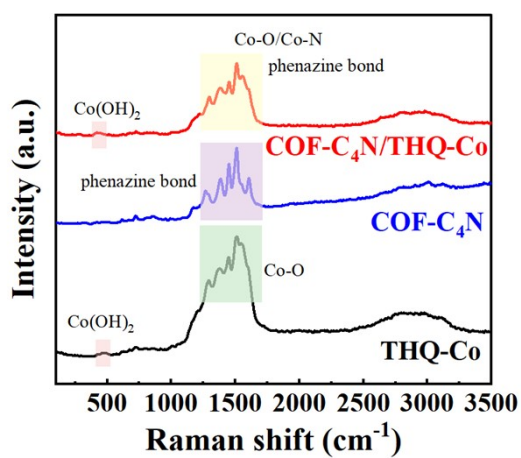

**Fig. S5** Raman spectra of THQ-Co, COF-C<sub>4</sub>N, and COF-C<sub>4</sub>N/THQ-Co.

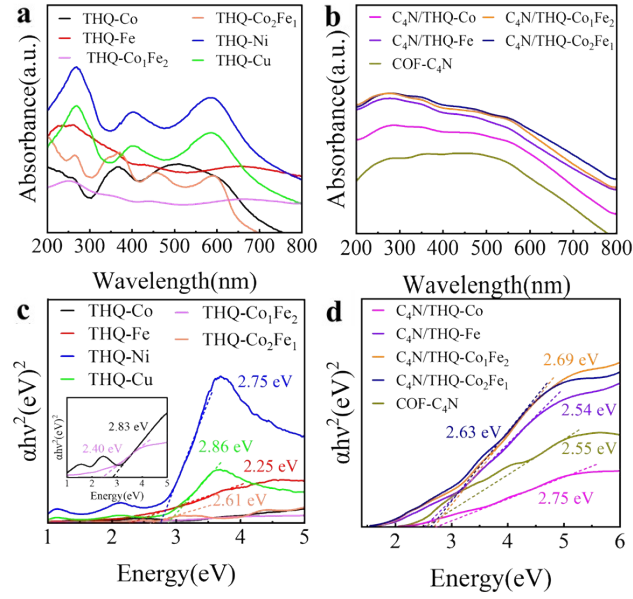

**Fig. S6** (a-b) UV-Vis diffuse reflectance spectrum and (c-d) Tauc plot of THQ-M, COF-C<sub>4</sub>N/THQ-M and COF-C<sub>4</sub>N.

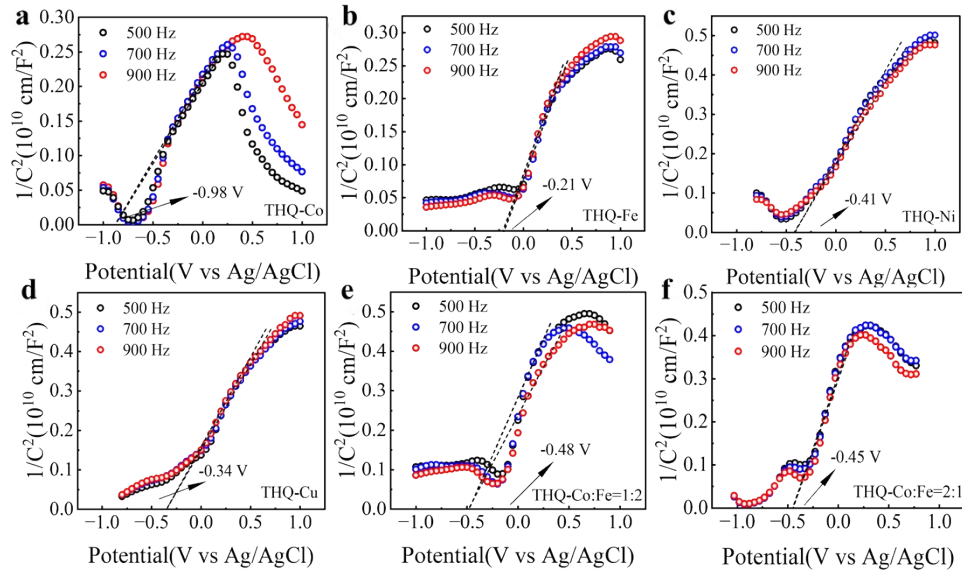

**Fig. S7** (a-f) Mott-Schottky plots of THQ-M.

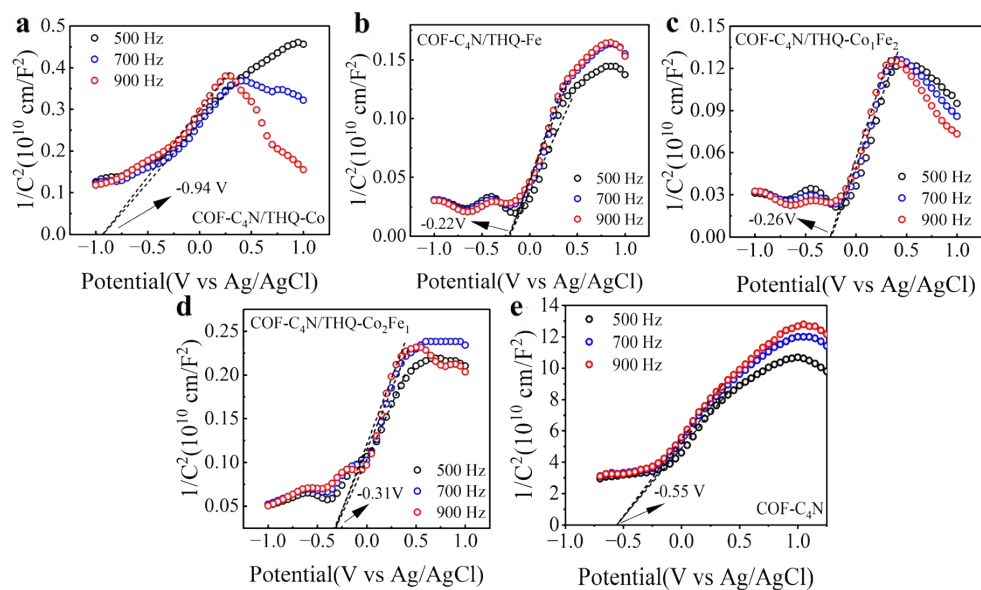

**Fig. S8** Mott-Schottky plots of (a-d) COF-C<sub>4</sub>N/THQ-M and (e) COF-C<sub>4</sub>N.

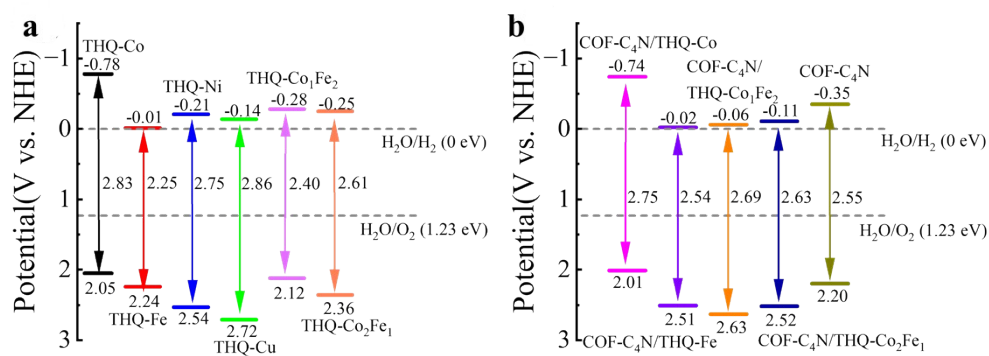

**Fig. S9** Diagrams of the energy level of the valence and conduction band for (a) THQ-M and (b) COF-C<sub>4</sub>N /THQ-M and COF-C<sub>4</sub>N.

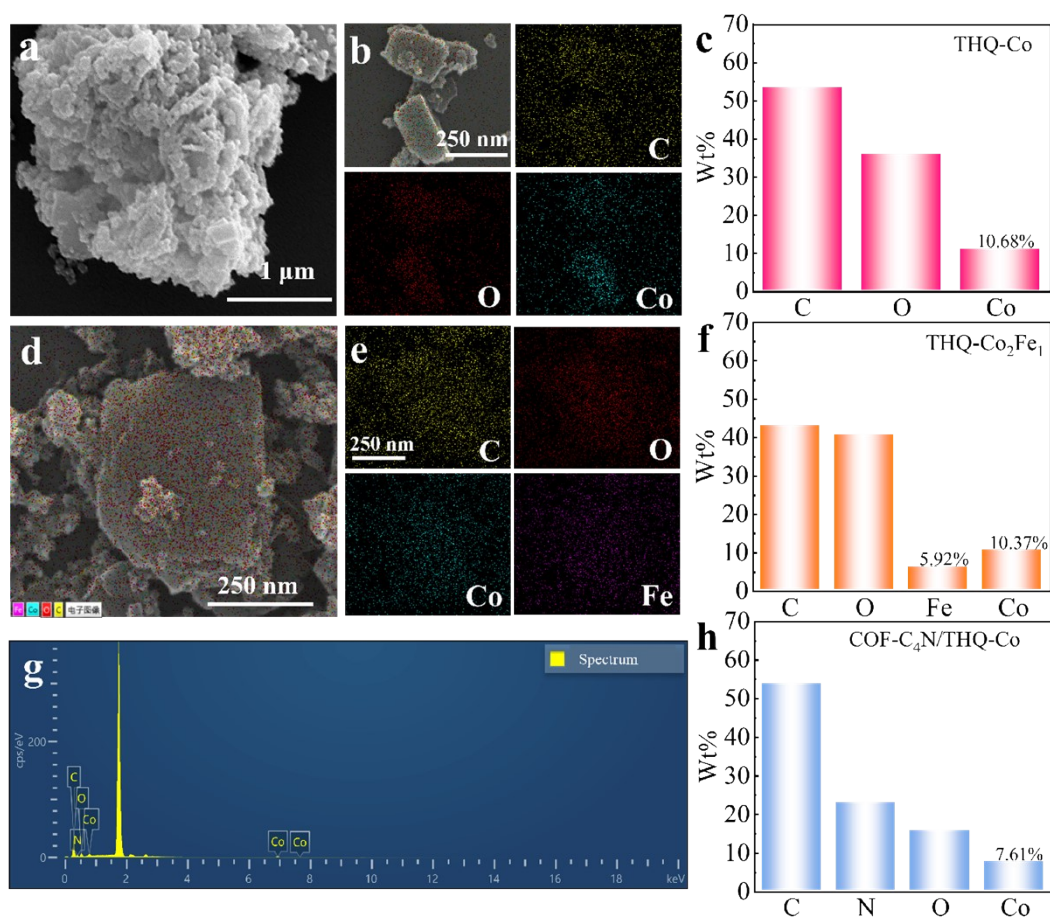

**Fig. S10** Sample THQ-Co for (a-c) SEM image, EDS elemental analysis and content of each element. THQ-Co<sub>2</sub>Fe<sub>1</sub> for (d-f) EDS elemental analysis and content of each element.

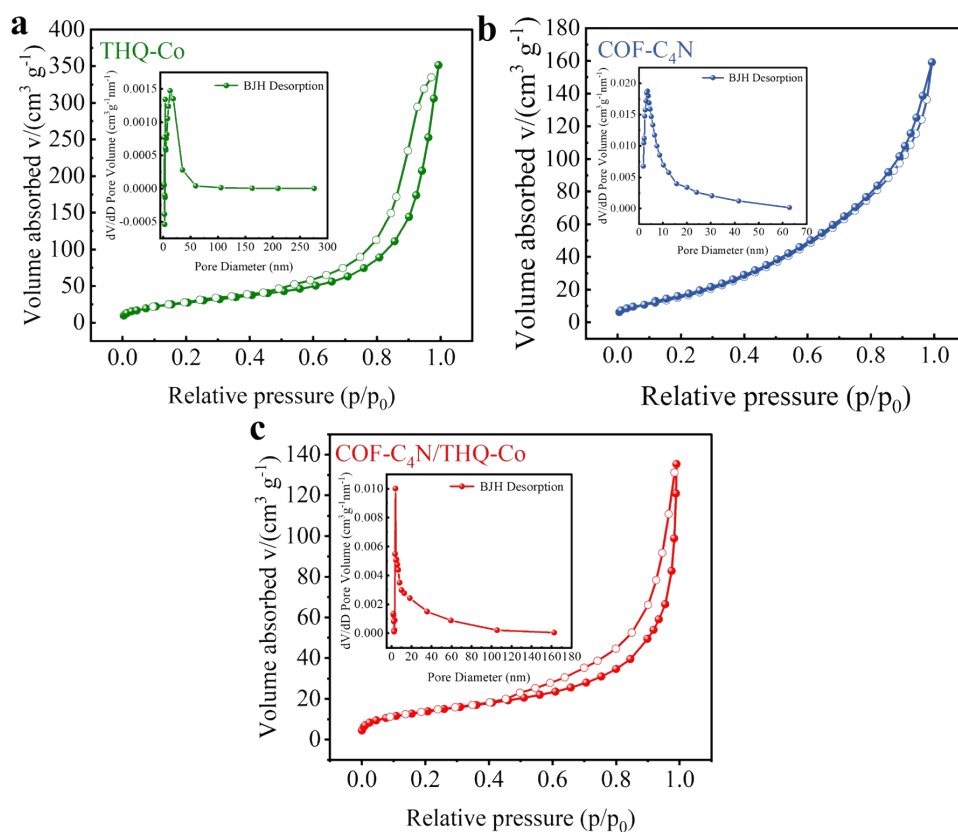

**Fig. S11** N<sub>2</sub> adsorption isotherms and BJH desorption pore size distribution curves (inserted) for (a) THQ-Co, (b) COF-C<sub>4</sub>N, and (c) COF-C<sub>4</sub>N/THQ-Co.

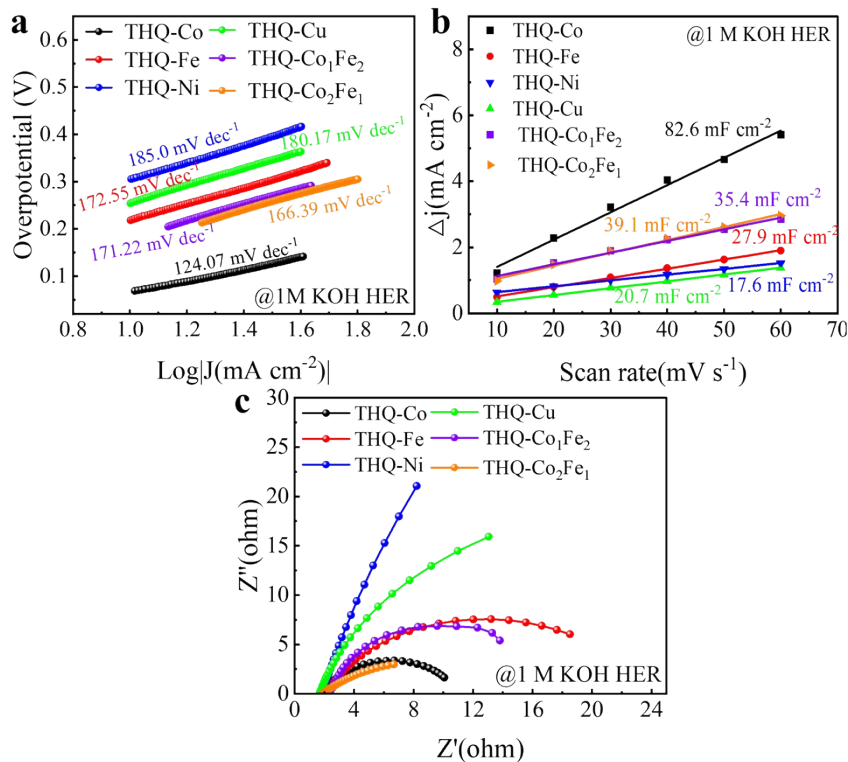

**Fig. S12** (a) Tafel plots of alkaline HER with different metal THQ-M obtained after LSV treatment; (b) plots of capacitance currents versus scanning rates obtained based on CV curves; (c) Nyquist plot for THQ-M alkaline HER.

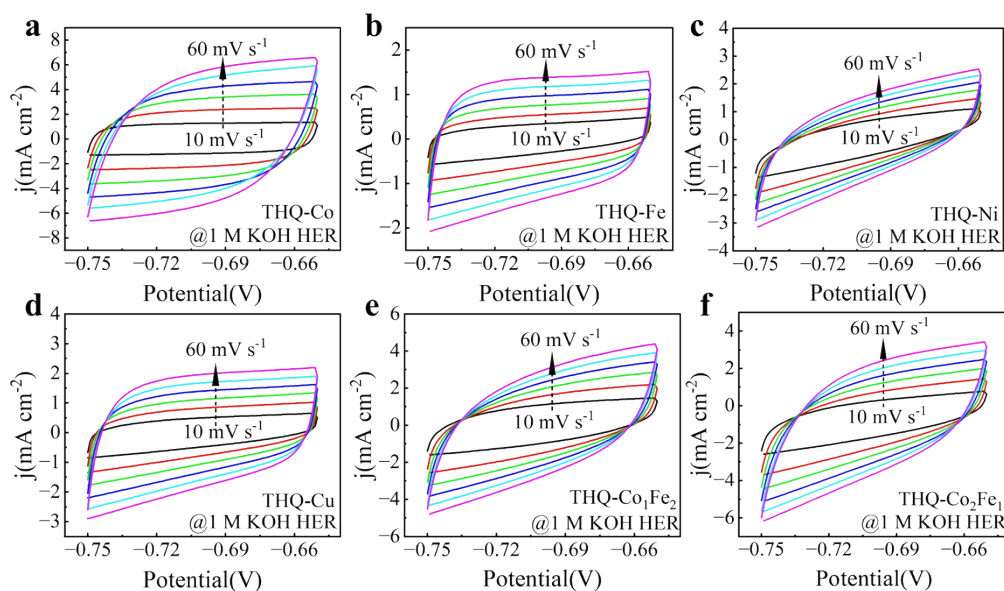

**Fig. S13** (a-f) CV curves of THQ-M at different scanning speeds during the HER process.



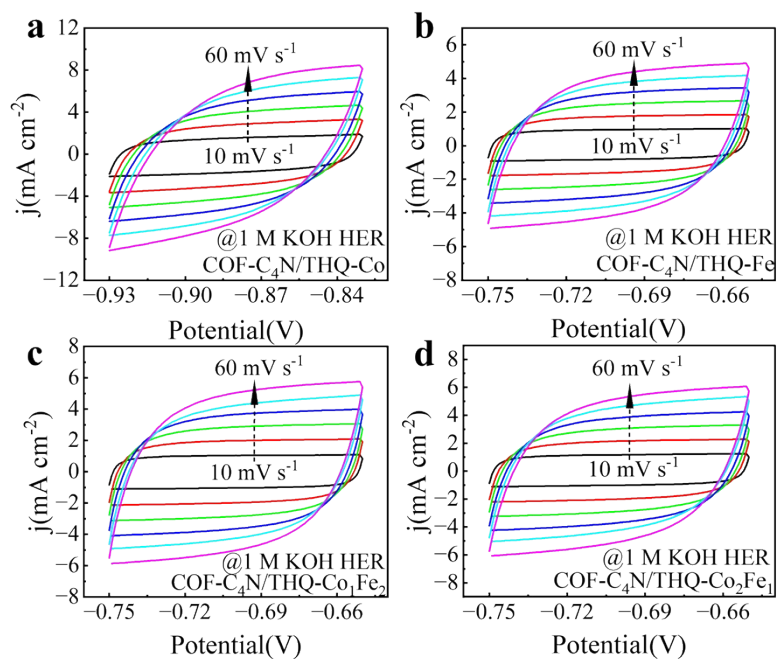

**Fig. S14** CV curves of (a) COF-C<sub>4</sub>N/THQ-Co, (b) COF-C<sub>4</sub>N/THQ-Fe, (c) COF-C<sub>4</sub>N/THQ-Co<sub>1</sub>Fe<sub>2</sub>, and (d) COF-C<sub>4</sub>N/THQ-Co<sub>2</sub>Fe<sub>1</sub> composite catalysts toward HER in alkaline media.

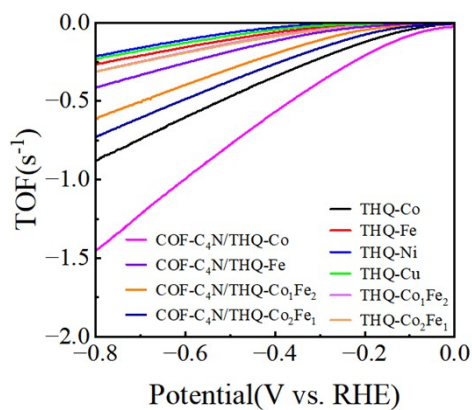

**Fig. S15** Calculated TOF data for HER in alkaline media.

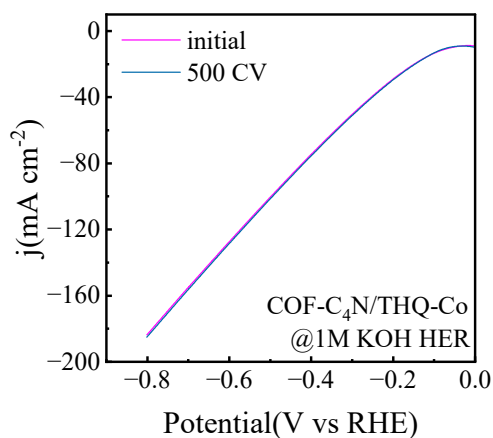

**Fig. S16** LSV curves of COF-C<sub>4</sub>N/THQ-Co before and after 500 cycles.

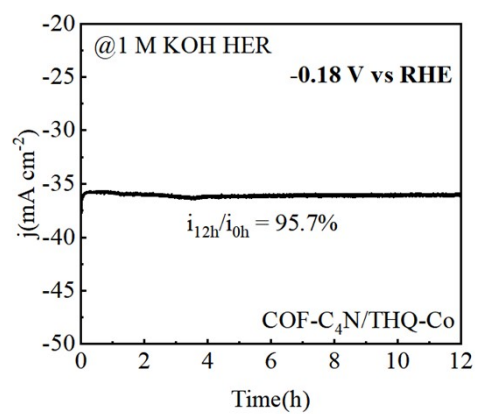

**Fig. S17** The chronopotentiometric curves of COF-C<sub>4</sub>N/THQ-Co at -0.18 V vs RHE for 12 h.

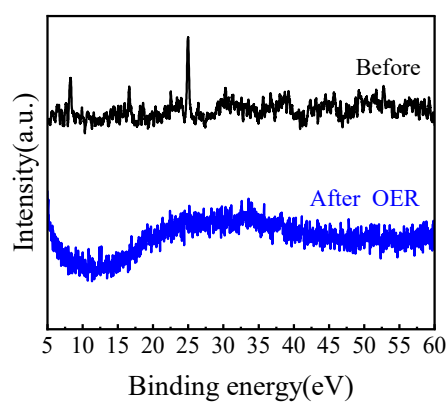

**Fig. S18** XRD comparison of THQ-Co before and after electrocatalytic OER.

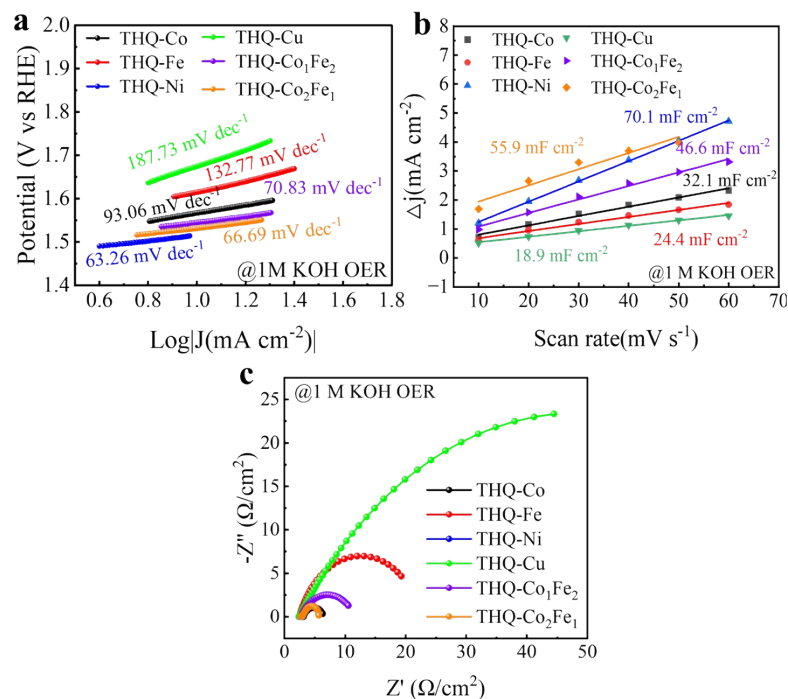

**Fig. S19** (a) Tafel plots of alkaline OER with different metal THQ-M obtained after LSV treatment; (b) plots of capacitance currents versus scanning rates obtained based on CV curves; (c) Nyquist plot for THQ-M alkaline OER.

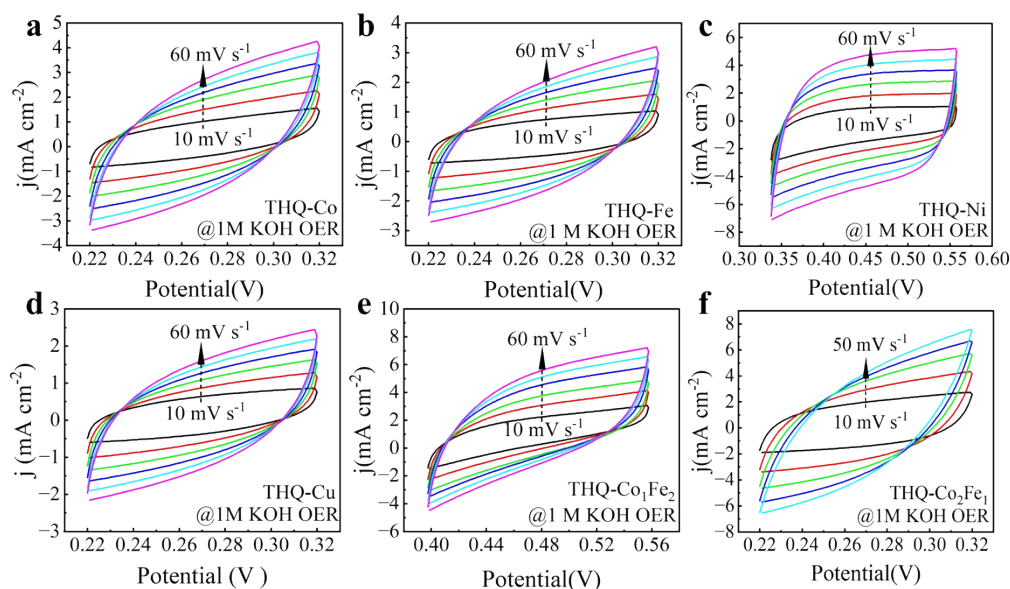

**Fig. S20** (a-f) CV curves of THQ-M at different scanning speeds during the OER process.

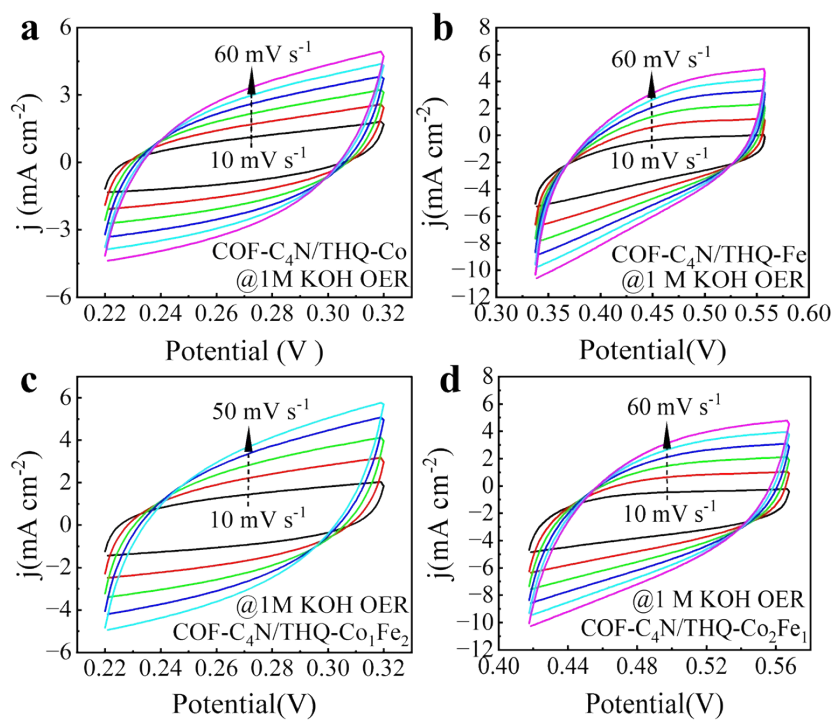

**Fig. S21** (a-f) CV curves of COF-C<sub>4</sub>N/THQ-M composite catalysts at different scanning speeds during the OER process.

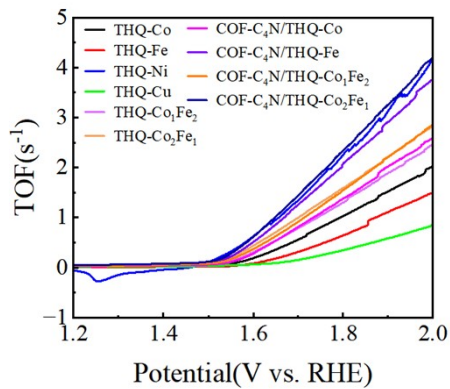

**Fig. S22** Calculated TOF data toward OER in alkaline media.

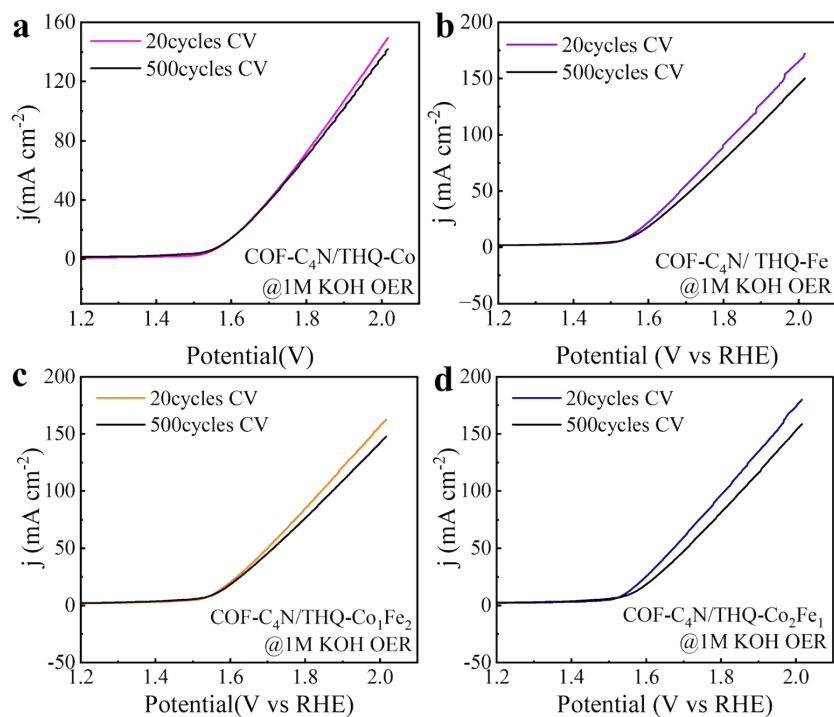

**Fig. S23** LSV curves of COF-C<sub>4</sub>N/THQ-Co before and after 500 cycles.

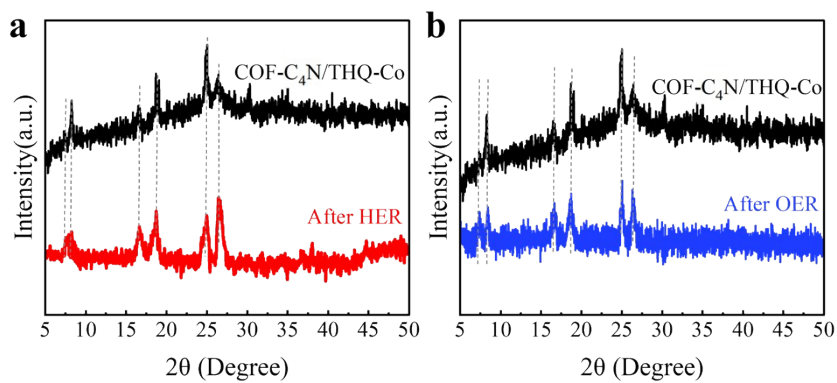

**Fig. S24** XRD patterns of COF-C<sub>4</sub>N/THQ-Co after stability tests for a) HER, b) OER in 1 M KOH media.

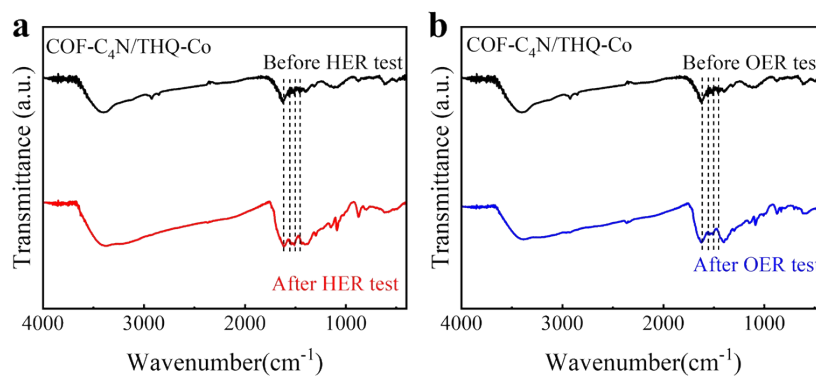

**Fig. S25** The FT-IR spectra of COF-C<sub>4</sub>N/THQ-Co before (black) , (a) after (red) the HER chronoamperometry test, and (b) after (blue) the OER chronoamperometry test.

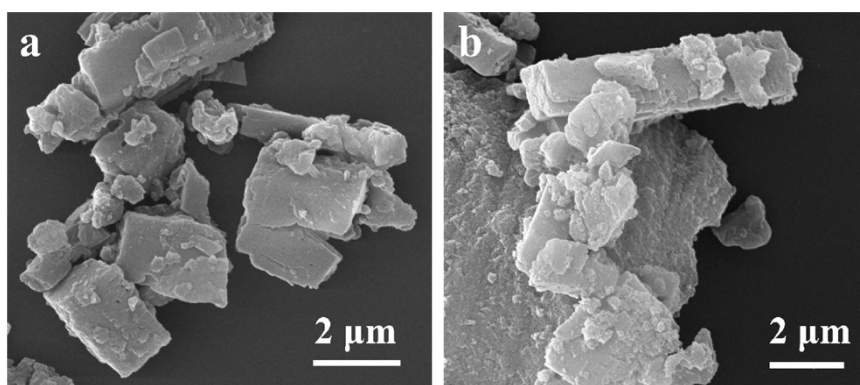

**Fig. S26** The SEM images of COF-C<sub>4</sub>N/THQ-Co, after (a) HER and (b) OER chronoamperometry test.

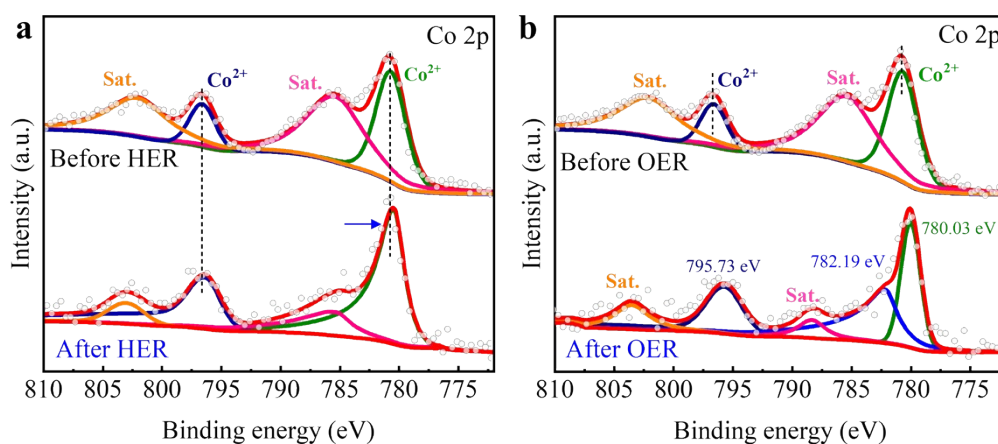

**Fig. S27** The XPS Co 2p spectra of COF-C<sub>4</sub>N/THQ-Co respectively after stability tests for (a) HER and (b) OER in 1.0 M KOH media.

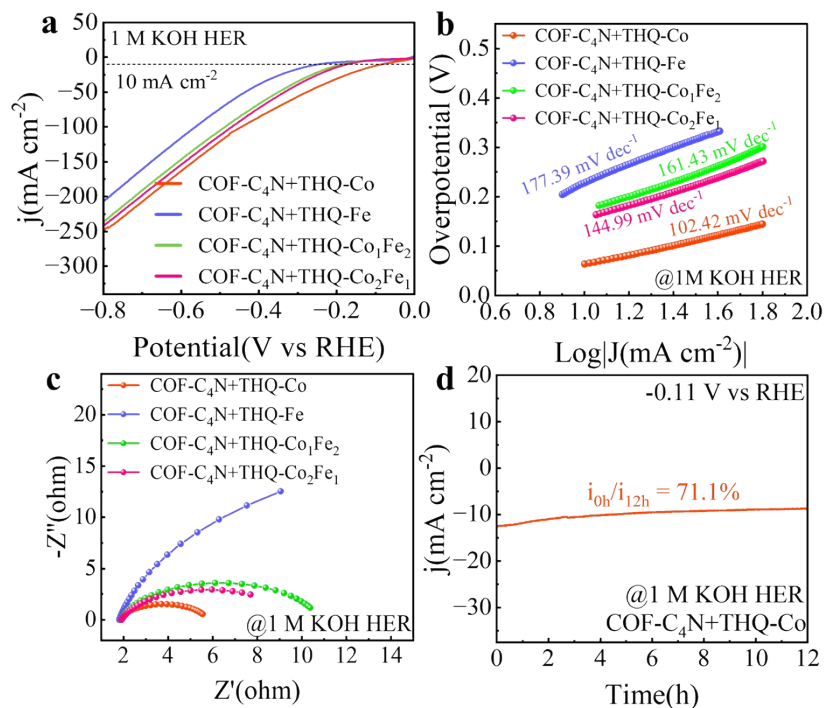

**Fig. S28** (a) LSV curves, (b) Tafel slopes, and (c) EIS spectra of COF-C<sub>4</sub>N+THQ-Co, COF-C<sub>4</sub>N+THQ-Fe, COF-C<sub>4</sub>N+THQ-Co<sub>1</sub>Fe<sub>2</sub>, COF-C<sub>4</sub>N+THQ-Co<sub>2</sub>Fe<sub>1</sub> toward HER in alkaline media, (d) chronopotentiometric curves of COF-C<sub>4</sub>N+THQ-Co at -0.11 V vs RHE for 12 h.

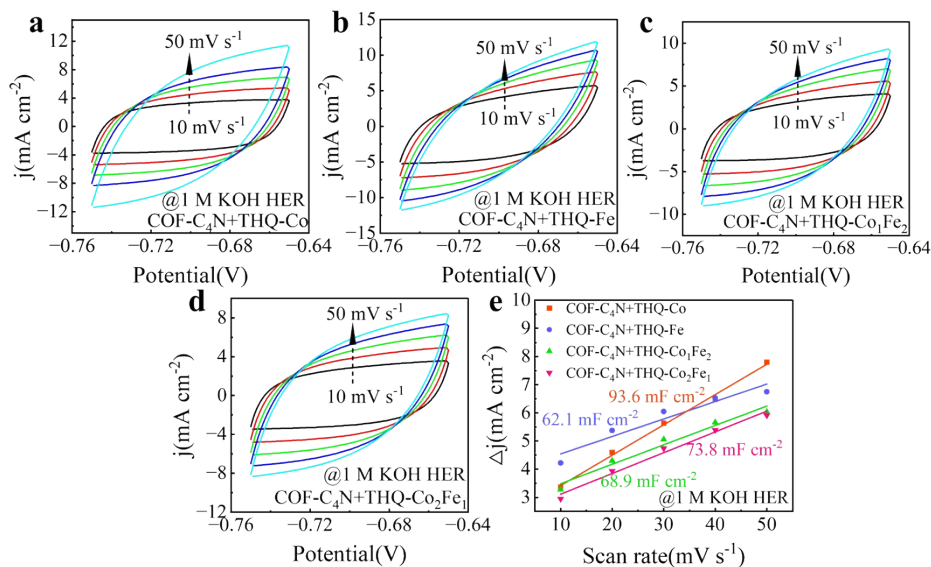

**Fig. S29** CVs for (a) COF-C<sub>4</sub>N+THQ-Co, (b) COF-C<sub>4</sub>N+THQ-Fe, (c) COF-C<sub>4</sub>N+THQ-Co<sub>1</sub>Fe<sub>2</sub>, (d) COF-C<sub>4</sub>N+THQ-Co<sub>2</sub>Fe<sub>1</sub> toward HER in alkaline media, (e) C<sub>dl</sub> values.



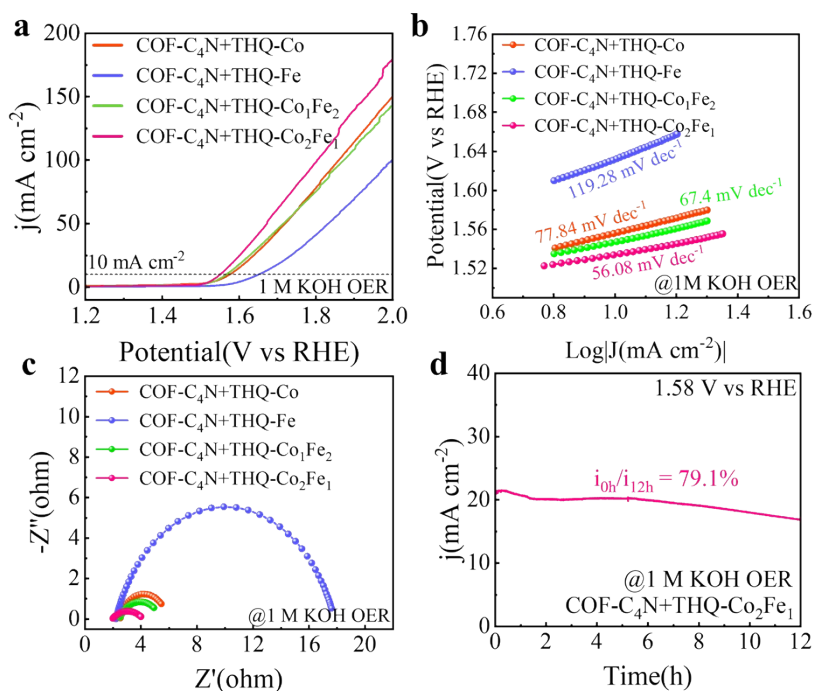

**Fig. S30** (a) LSV curves, (b) Tafel slopes, and (c) EIS spectra of COF-C<sub>4</sub>N+THQ-Co, COF-C<sub>4</sub>N+THQ-Fe, COF-C<sub>4</sub>N+THQ-Co<sub>1</sub>Fe<sub>2</sub>, COF-C<sub>4</sub>N+THQ-Co<sub>2</sub>Fe<sub>1</sub> toward OER in alkaline media, (d) chronopotentiometric curves of COF-C<sub>4</sub>N+THQ-Co<sub>2</sub>Fe<sub>1</sub> at 1.58 V vs RHE for 12 h.

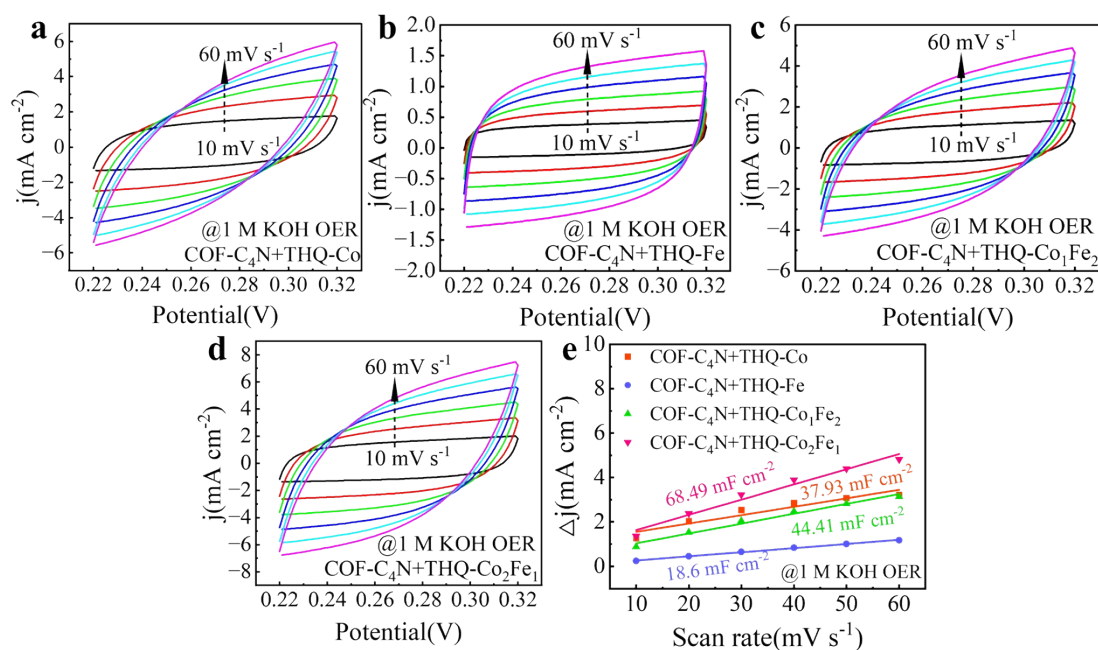

**Fig. S31** CVs for (a) COF-C<sub>4</sub>N+THQ-Co, (b) COF-C<sub>4</sub>N+THQ-Fe, (c) COF-C<sub>4</sub>N+ THQ-Co<sub>1</sub>Fe<sub>2</sub>, (d) COF-C<sub>4</sub>N+THQ-Co<sub>2</sub>Fe<sub>1</sub> toward OER in alkaline media, (e)  $C_{dl}$  values.



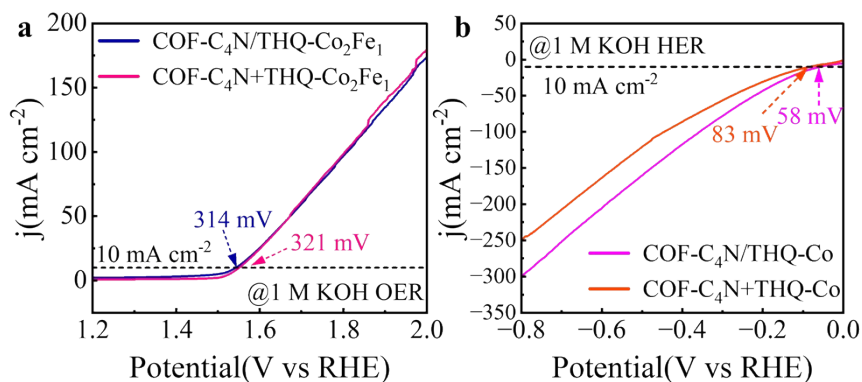

**Fig. S32** (a) Comparison of OER polarization curves of COF-C<sub>4</sub>N/THQ-Co<sub>2</sub>Fe<sub>1</sub> and COF-C<sub>4</sub>N+THQ-Co<sub>2</sub>Fe<sub>1</sub> in alkaline media, (b) Comparison of HER polarization curves of COF-C<sub>4</sub>N/THQ-Co and COF-C<sub>4</sub>N+THQ-Co in alkaline media.

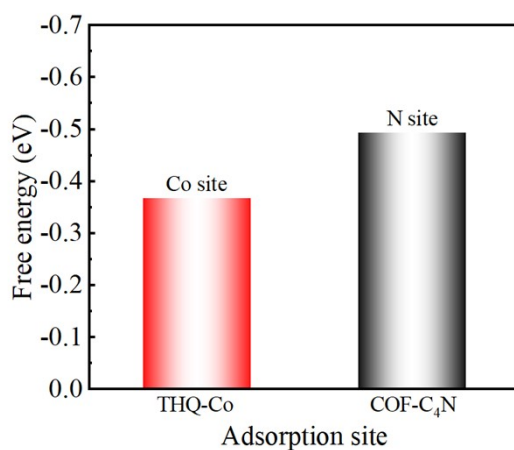

**Fig. S33** The calculated  $\Delta G_{H^*}$  of the THQ-Co and COF-C<sub>4</sub>N catalyst at different hydrogen adsorption sites for HER.

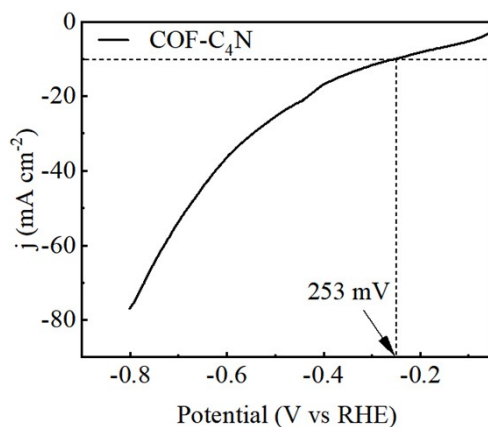

**Fig. S34** HER polarization curves of COF-C<sub>4</sub>N in alkaline media.

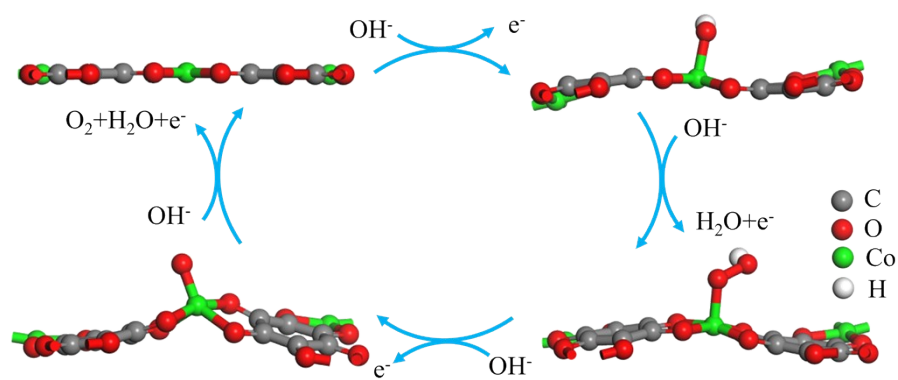

**Fig. S35** Configurations of reaction intermediates on the reaction pathways of the oxygen evolution of THQ-Co. C: gray balls; O: red balls; Co: green balls; H: white balls.

## Supplementary Table

**Table S1.** ICP-OES data of elemental Co content in THQ-Co and COF-C<sub>4</sub>N/THQ-Co

| Sample                  | Sample quality $m_0$ (g) | Test element | Test solution element concentration $C_o$ (mg/L) | Sample element content $C_X$ (mg / kg) | Sample element content w (%) |
|-------------------------|--------------------------|--------------|--------------------------------------------------|----------------------------------------|------------------------------|
| THQ-Co                  | $1.64 \times 10^{-2}$    | Co           | 8.89                                             | 270975.61                              | 27.10%                       |
| COF-                    |                          |              | 3.36                                             | 156009.22                              | 15.60%                       |
| C <sub>4</sub> N/THQ-Co | $5.39 \times 10^{-2}$    | Co           |                                                  |                                        |                              |

**Table S2.** Pore volume distribution of micro- and mesopores for THQ-Co, COF-C<sub>4</sub>N, and COF-C<sub>4</sub>N/THQ-Co

|                             | micro porosity (%) | meso porosity (%) |
|-----------------------------|--------------------|-------------------|
| THQ-Co                      | 7.65               | 92.35             |
| COF-C <sub>4</sub> N        | 7.70               | 92.30             |
| COF-C <sub>4</sub> N/THQ-Co | 9.33               | 90.67             |

**Table S3.** ICP-OES data of elemental Co content in COF-C<sub>4</sub>N/THQ-Co after electrocatalytic OER and HER

|     | Sample quality $m_0$ (g) | Test element | Test solution element concentration $C_o$ (mg/L) | Sample element content $C_X$ (mg / kg) | Sample element content w (%) |
|-----|--------------------------|--------------|--------------------------------------------------|----------------------------------------|------------------------------|
| HER | $4.94 \times 10^{-2}$    | Co           | 2.68                                             | 135429.87                              | 13.54%                       |
| OER | $4.87 \times 10^{-2}$    | Co           | 2.28                                             | 116903.65                              | 11.69%                       |

**Table S4.** Comparison of electrocatalysts for HER under alkaline conditions

| Catalyst                                                 | Electrolyte | $\eta$ @-10 mA cm <sup>-2</sup> (mV) | References                                  |
|----------------------------------------------------------|-------------|--------------------------------------|---------------------------------------------|
| Co@NCNTs-800                                             | 1.0 M KOH   | 240                                  | New J. Chem. 2017, 41, 10966-10971.         |
| Co-1T-MoS <sub>2</sub> -bpe                              | 1.0 M KOH   | 118                                  | Angew. Chem. Int. Ed. 2023, 62, e202313845. |
| MoC <sub>x</sub>                                         | 1.0 M KOH   | 151                                  | Nat. Commun. 2015, 6, 6512.                 |
| CoPS/N-C                                                 | 1.0 M KOH   | 148                                  | Nanoscale 2018, 10, 7291-7297.              |
| Fe-Ni@NC-CNTs                                            | 1.0 M KOH   | 202                                  | J. Alloys Compd. 2021, 850, 156583.         |
| FeCoNi MOF/NF                                            | 1.0 M KOH   | 116                                  | J. Am. Chem. Soc. 2022, 144, 3411-3428.     |
| Fe(OH) <sub>x</sub> @Cu-MOF                              | 1.0 M KOH   | 112                                  | Sci. Adv. 2021, 7, eabg2580.                |
| D-Ni-MOF NSA                                             | 1.0 M KOH   | 101                                  | Small 2020, 16, 1906564.                    |
| RuO <sub>2</sub> /Co <sub>3</sub> O <sub>4</sub>         | 1.0 M KOH   | 89                                   | RSC Adv. 2017, 7, 3686-3694.                |
| MoS <sub>2</sub> /NiCo-LDH                               | 1.0 M KOH   | 78                                   | Joule 2017, 1, 383-393.                     |
| FeS/FeOOH-ZnO@NF                                         | 1.0 M KOH   | 74                                   | K. Alloys Compd. 2024, 991, 174525.         |
| CuCo-CAT/CC                                              | 1.0 M KOH   | 52                                   | Adv. Mater. 2021, 33, 2106781.              |
| COF-C <sub>4</sub> N/THQ-Co                              | 1.0 M KOH   | 58                                   | This work                                   |
| COF-C <sub>4</sub> N/THQ-Co <sub>2</sub> Fe <sub>1</sub> | 1.0 M KOH   | 132                                  | This work                                   |

**Table S5.** Comparison of electrocatalysts for OER under alkaline conditions

| Catalyst                                                 | Electrolyte | $\eta$ @10 mA cm <sup>-2</sup> (mV) | References                                        |
|----------------------------------------------------------|-------------|-------------------------------------|---------------------------------------------------|
| Co <sub>3</sub> ZnC/Co                                   | 1.0 M KOH   | 366                                 | J. Mater. Chem. A<br>2016, 4, 9204-9212.          |
| NNU-23                                                   | 0.1 M KOH   | 365                                 | Angew. Chem. Int.<br>Ed. 2018, 57, 9660-<br>9664. |
| COF@CNT                                                  | 1.0 M KOH   | 350                                 | Chem. Eng. J. 2021,<br>415, 127850.               |
| COF-C <sub>4</sub> N                                     | 1.0 M KOH   | 349                                 | ACS Energy Lett.<br>2019, 4, 2251-2258.           |
| N-MoS <sub>2</sub> /COF-C <sub>4</sub> N                 | 1.0 M KOH   | 349                                 | SSRN 2023, 13, 90-<br>101.                        |
| Ni-COF                                                   | 1.0 M KOH   | 335                                 | JACS Au 2021, 1,<br>1497-1505.                    |
| Co-COF@MOF                                               | 1.0 M KOH   | 328                                 | Small<br>2024,20,2308598.                         |
| Fe-Co <sub>2</sub> P@NPDC                                | 0.1 M KOH   | 320                                 | Chem. Eng. J. 2022,<br>446, 137210.               |
| Ni <sub>0.5</sub> Fe <sub>0.5</sub> @COF-SO <sub>3</sub> | 1.0 M KOH   | 308                                 | Inorg. Chem. 2020,<br>59, 4995-5003.              |
| Co <sub>3</sub> Fe-MOF                                   | 1.0 M KOH   | 280                                 | J. Mater. Chem. A<br>2020, 8, 3658-3666.          |
| USTA-16                                                  | 1.0 M KOH   | 408                                 | Mater.<br>Interfaces<br>2017, 9,<br>7193.         |
| CoO <sub>x</sub> -ZIF                                    | 1.0 M KOH   | 318                                 | Adv. Funct.<br>Mater. 2017,<br>27, 1702546.       |
| FeNi@NC                                                  | 1.0 M NaOH  | 280                                 | Environ. Sci.<br>2016, 9, 123                     |
| FeCo@CNTs-60                                             | 0.1 M KOH   | 440                                 | Appl.<br>Catal. B Environ.<br>2024, 341, 123346   |
| COF-C <sub>4</sub> N/THQ-Co <sub>2</sub> Fe <sub>1</sub> | 1.0 M KOH   | 314                                 | This work                                         |

|                             |           |     |           |
|-----------------------------|-----------|-----|-----------|
| COF-C <sub>4</sub> N/THQ-Co | 1.0 M KOH | 339 | This work |
|-----------------------------|-----------|-----|-----------|
